# Supplementary material for: The Physico-Chemical Properties of Glipizide: New Findings
Source: MDPI journal article supplement (doi:10.3390/molecules26113142), 2021-05-24
Supplement: s1 [file s1]

## Supplementary material

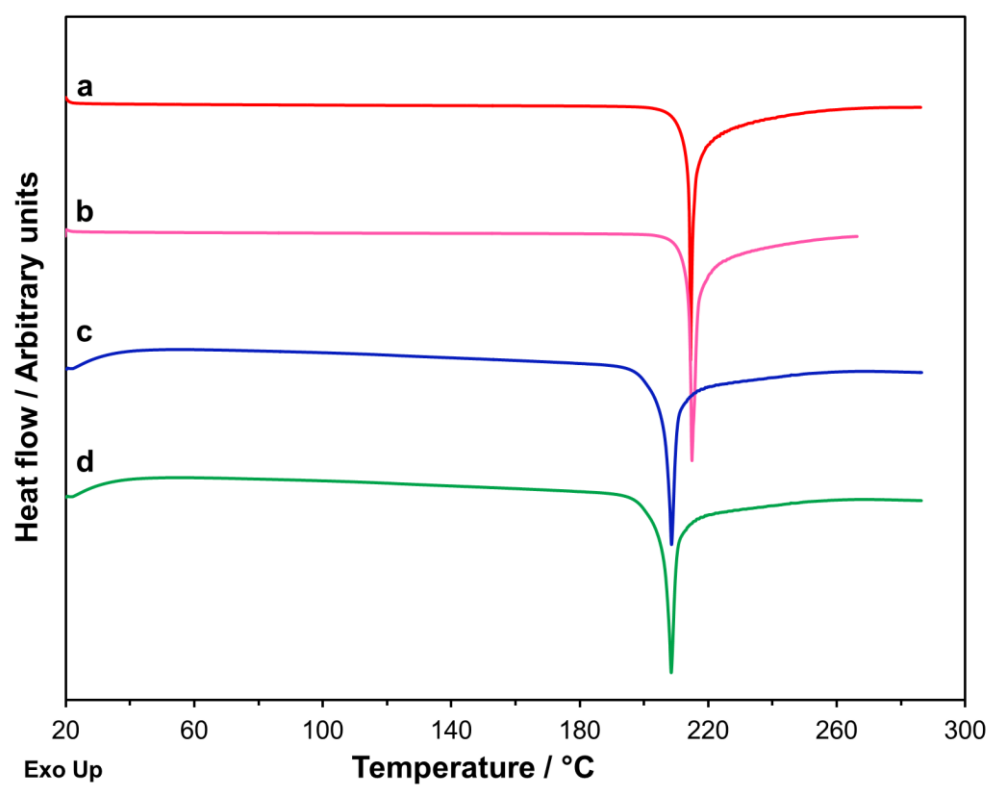

**Fig. S1** DSC traces of a production batch (a), USP H1H396 (b), USP R09020 (c) and *GPZ3h* (d) samples at 10 K·min<sup>-1</sup> heating rate.

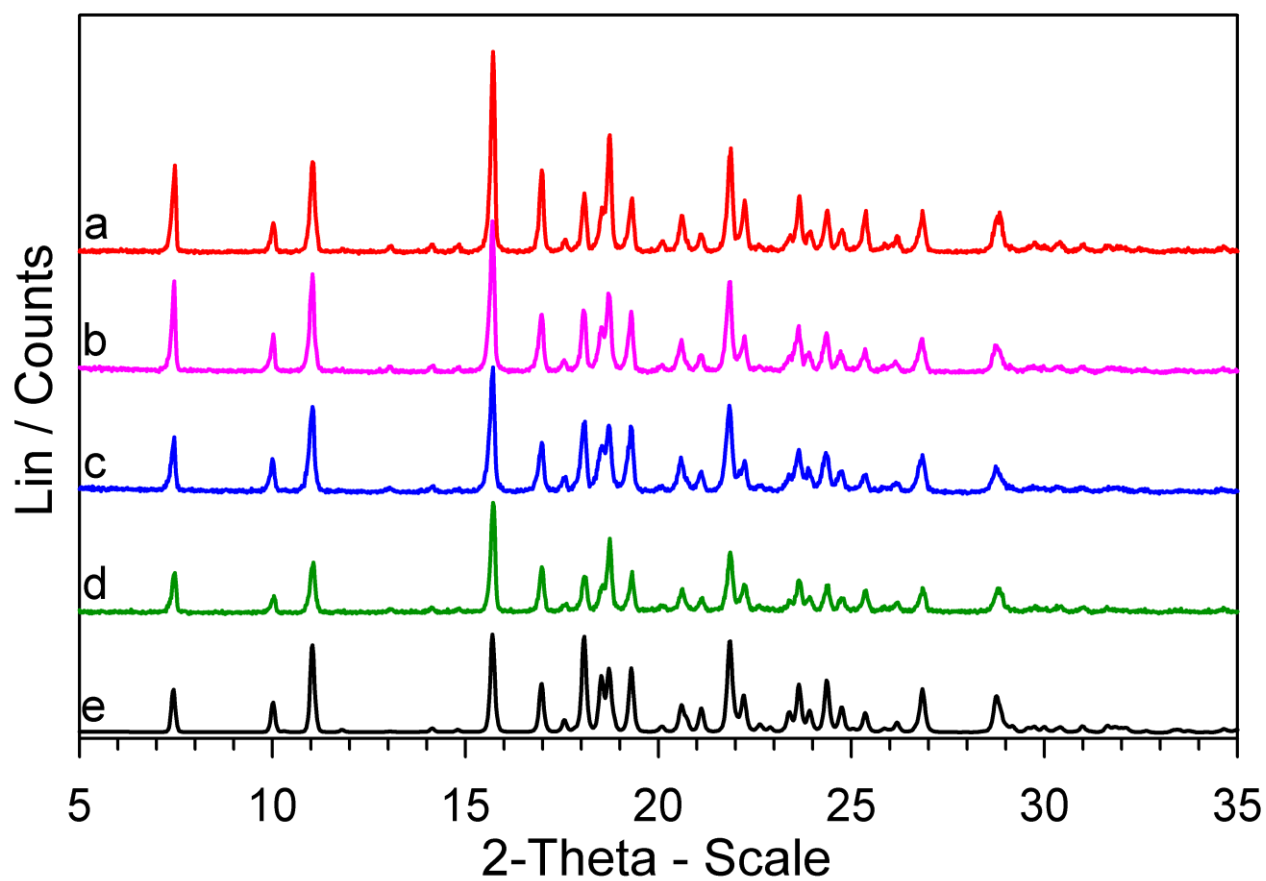

**Fig. S2** XRPD patterns of a glipizide production batch (a), USP H1H396 (b), USP R09020 (c) and *GPZ3h* (d) samples. XRPD simulated pattern of GPZ [13] (e).

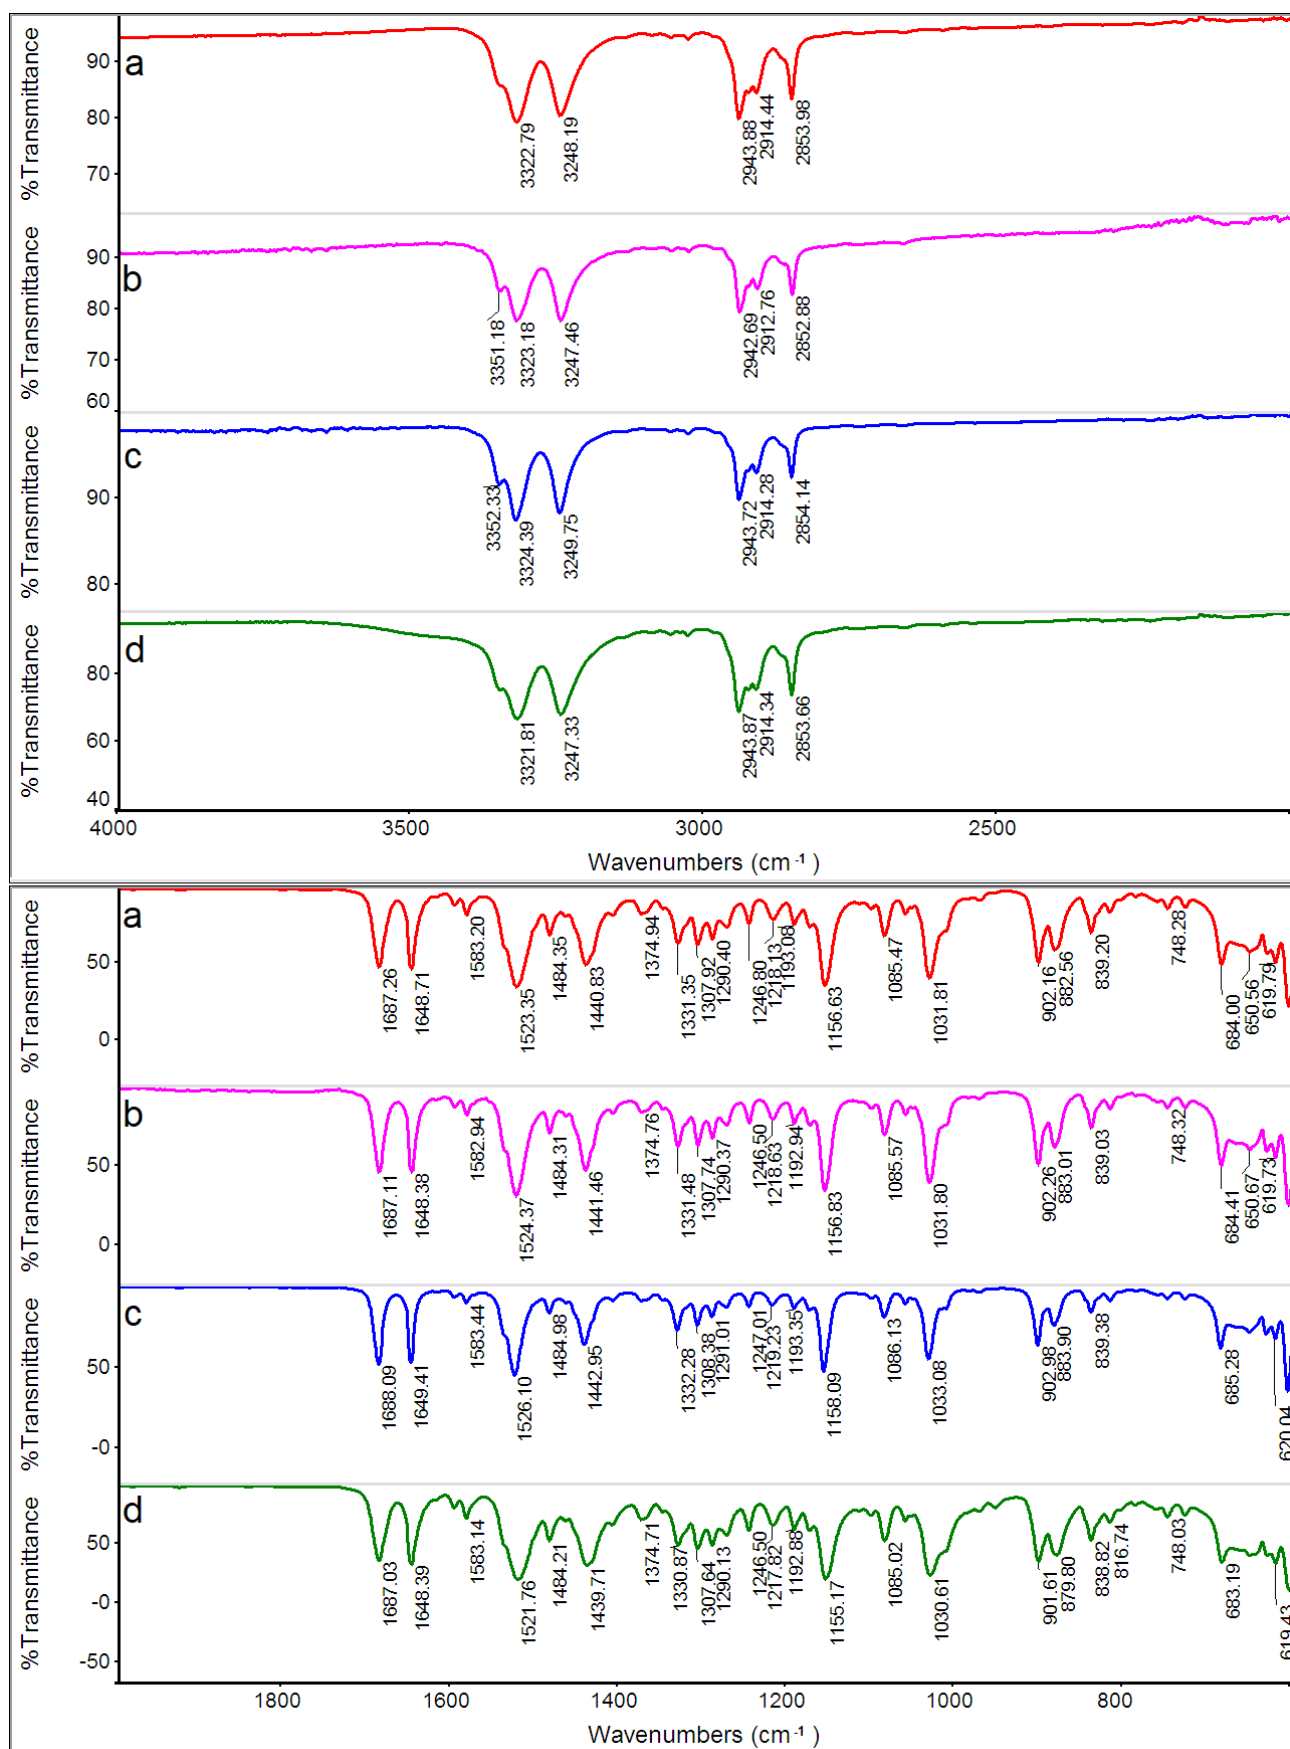

**Fig. S3** FT-IR spectra of a glipizide production batch (a), USP H1H396 (b), USP R09020 (c) and GPZ3h (d) samples.

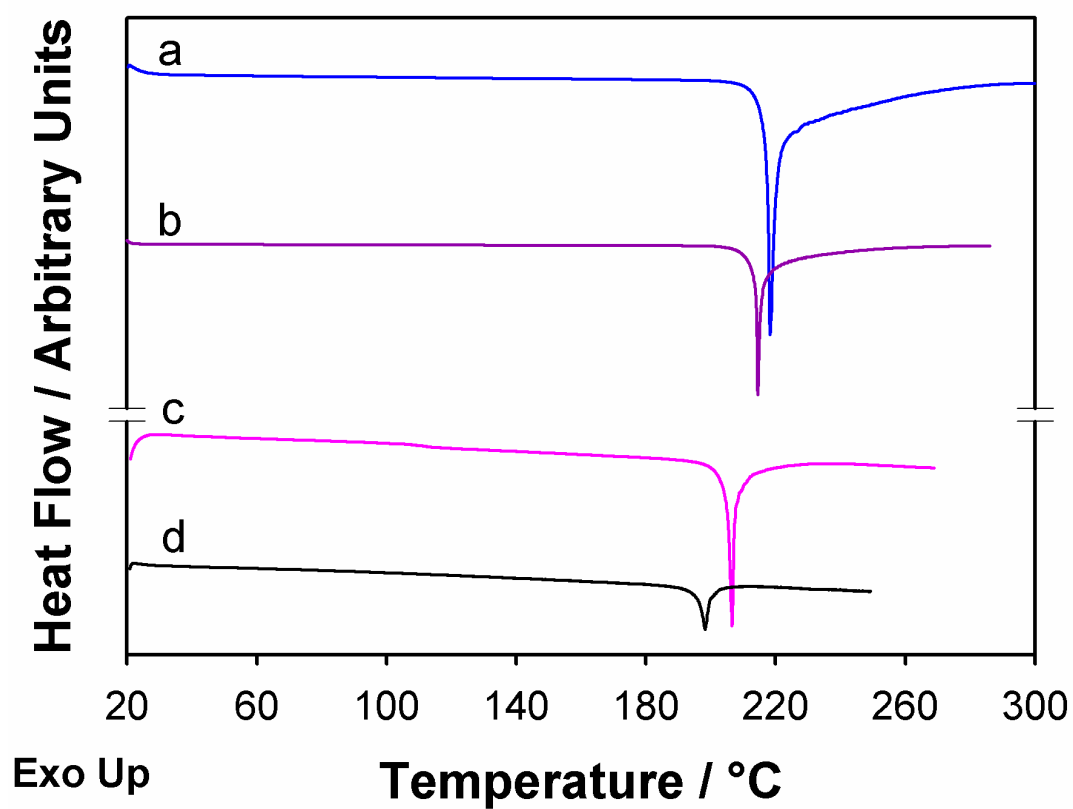

**Fig. S4** DSC curves recorded on a glipizide production batch under nitrogen flow at 30 K·min<sup>-1</sup> (a), 10 K·min<sup>-1</sup> (b), 2 K min<sup>-1</sup> (c) and 0.5 K·min<sup>-1</sup> (d).

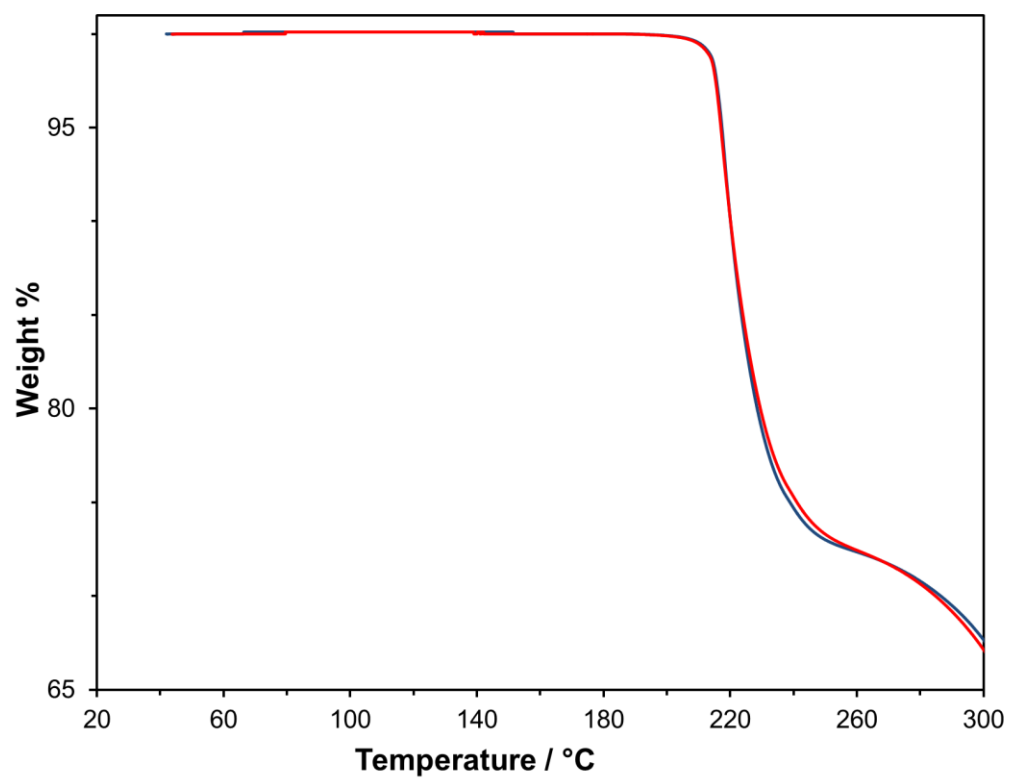

**Fig. S5** TG curves registered on a glipizide production batch at 10 K·min<sup>-1</sup> under nitrogen flow (red) and in air (blue).

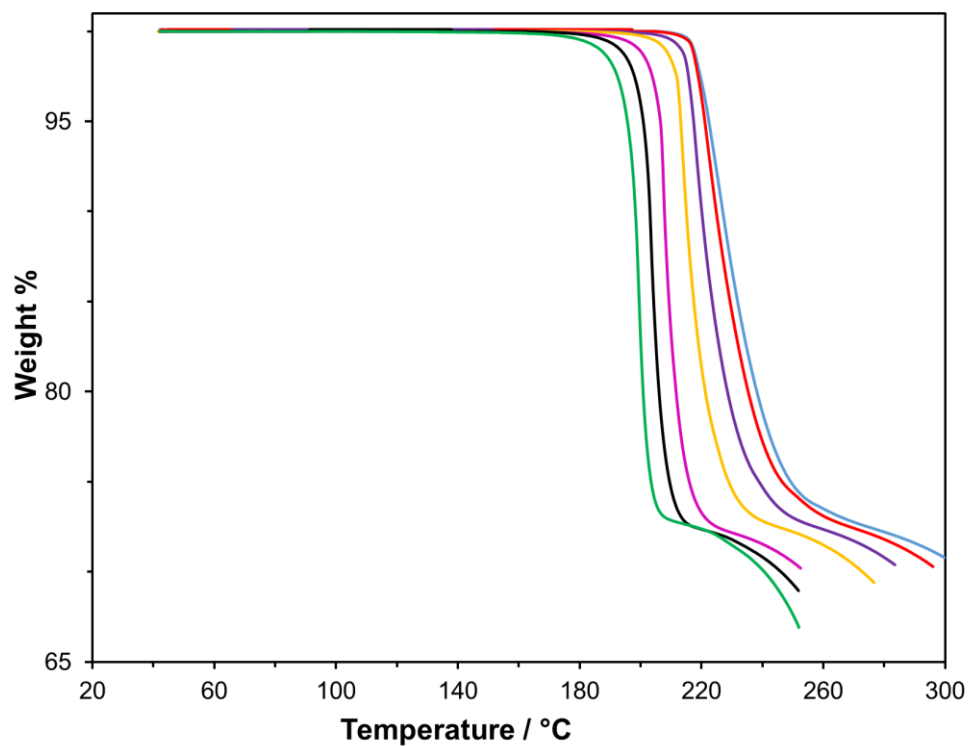

**Fig. S6** TG curves registered on a glipizide production batch under nitrogen flow at different heating rates. From right to left: 30 K·min<sup>-1</sup> (blue), 20 K·min<sup>-1</sup> (red), 10 K·min<sup>-1</sup> (violet), 5 K·min<sup>-1</sup> (yellow), 2 K·min<sup>-1</sup> (pink), 1 K·min<sup>-1</sup> (black) and 0.5 K·min<sup>-1</sup> (green).

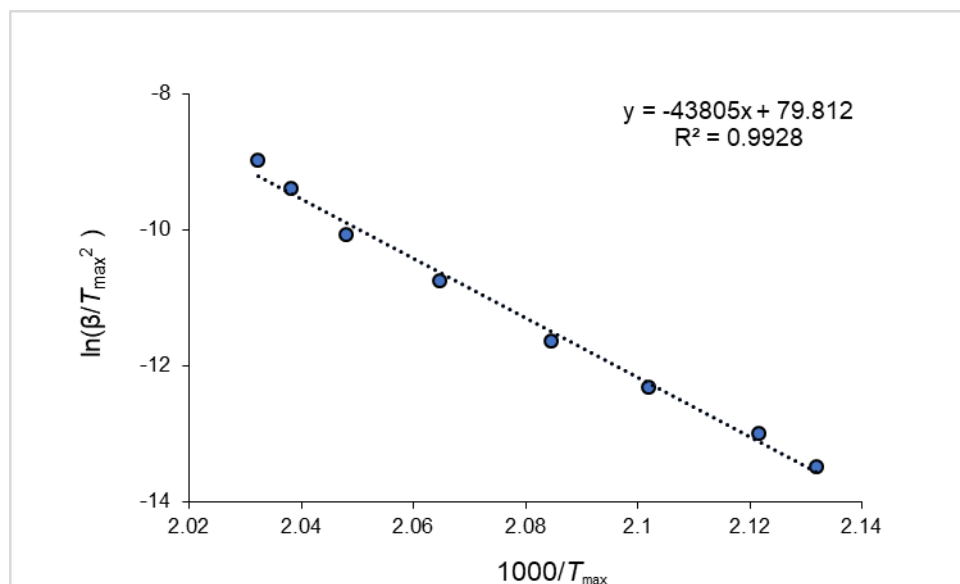

**Fig. S7** Experimental data points plotted according to the Kissinger method.

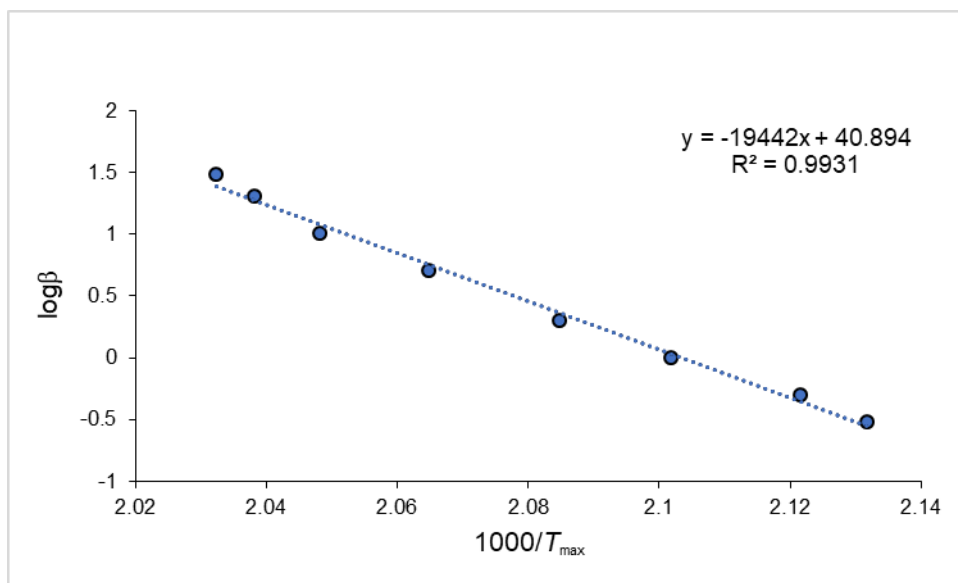

**Fig. S8** Experimental data points plotted according to the Ozawa-Flynn-Wall method and their linear regression.

**Table S1** Data used to determine the Kissinger equation.

| $\beta$ , K·min <sup>-1</sup> | $T_{\max}$ , K | $1/T_{\max}$ | $\ln(\beta/T_{\max}^2)$ |
|-------------------------------|----------------|--------------|-------------------------|
| 30                            | 492.03         | 0.002032     | -8.9958                 |
| 20                            | 490.62         | 0.002038     | -9.3956                 |
| 10                            | 488.23         | 0.002048     | -10.079                 |
| 5                             | 484.30         | 0.002065     | -10.756                 |
| 2                             | 479.67         | 0.002085     | -11.653                 |
| 1                             | 475.75         | 0.002102     | -12.329                 |
| 0.5                           | 471.34         | 0.002122     | -13.004                 |
| 0.3                           | 469.06         | 0.002132     | -13.505                 |

**Table S2** Data used to determine the Ozawa-Flynn-Wall equation.

| $\beta$ , K·min <sup>-1</sup> | $T_{\max}$ , K | $1/T_{\max}$ | $\log\beta$ |
|-------------------------------|----------------|--------------|-------------|
| 30                            | 492.03         | 0.002032     | 1.477121    |
| 20                            | 490.62         | 0.002038     | 1.301029    |
| 10                            | 488.23         | 0.002048     | 1           |
| 5                             | 484.30         | 0.002065     | 0.698970    |
| 2                             | 479.67         | 0.002085     | 0.301029    |
| 1                             | 475.75         | 0.002102     | 0           |
| 0.5                           | 471.34         | 0.002122     | -0.301029   |
| 0.3                           | 469.06         | 0.002132     | -0.522878   |
